# Supplementary material
Source: publisher figshare collection journal article supplement (https://karger.figshare.com/ndownloader/files/8742427)
Supplement: Supplementary file 1 [file 8742427]

| **Supplementary Table S1. Scoring table for Controlling Nutritional Status** | | | | |
| --- | --- | --- | --- | --- |
| **Variables** | **Malnutrition degree** | | | |
| **None** | **Light** | **Moderate** | **Severe** |
| **Serum albumin (g/dL)** | **3.5** | **3.00–3.49** | **2.50–2.99** | **<2.5** |
| **Score** | **0** | **2** | **4** | **6** |
| **Total lymphocyte count (/mm3)** | **1,600** | **1,200–1,599** | **800–1,199** | **<800** |
| **Score** | **0** | **1** | **2** | **3** |
| **Total cholesterol (mg/dL)** | **180** | **140–179** | **100–139** | **<100** |
| **Score** | **0** | **1** | **2** | **3** |
| **CONUT scoring: Iseki *et al.* (2015) PLoS One. [11]** | | | | |
